# Supplementary material for: Mutational Asymmetries in the SARS-CoV-2 Genome May Lead to Increased Hydrophobicity of Virus Proteins
Source: Genes (Basel). 2021 May 27;12(6):826. doi: 10.3390/genes12060826 (PMC8227412; doi:10.3390/genes12060826)

**Figure S5.** Base frequency in motifs flanking the C>U substitutions. The source data are in **Table S8**. Nucleotide frequencies were normalized to base (A,C,G,U) distribution in the SARS-CoV-2 genome.

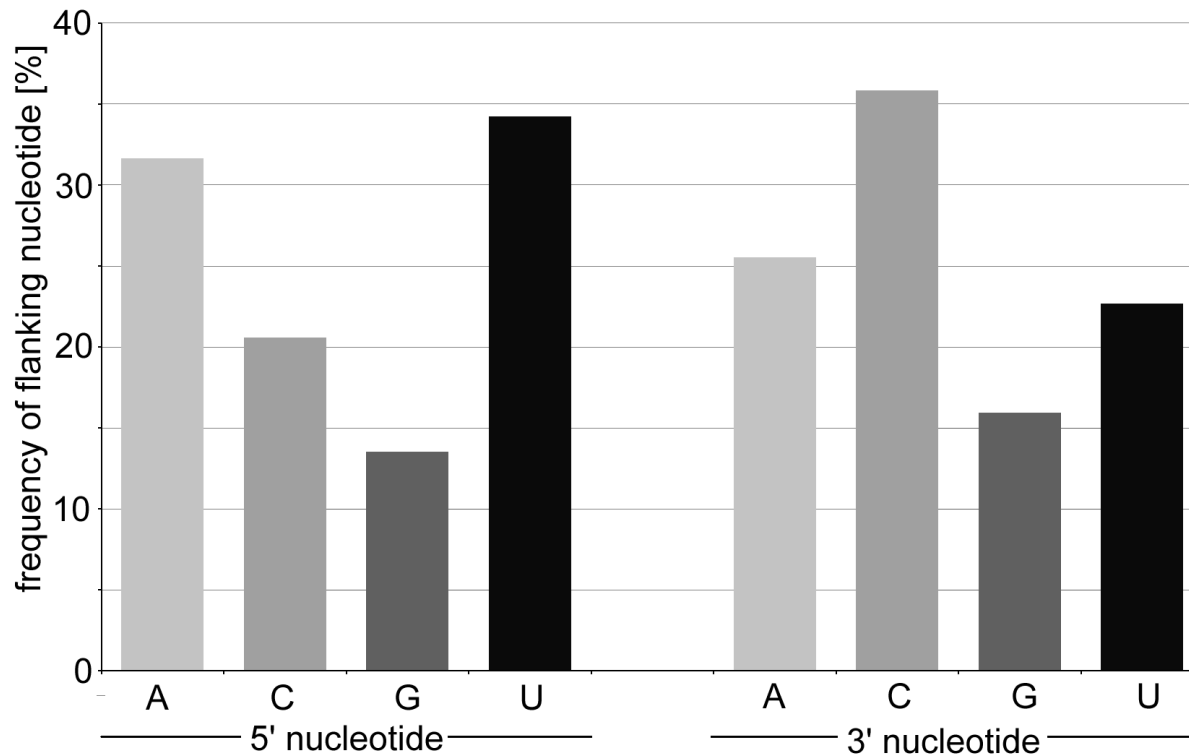

Supplement: Supplementary file 1 [file genes-12-00826-s001.zip › Figure S5.pdf]
