# Supplementary material for: Mutational Asymmetries in the SARS-CoV-2 Genome May Lead to Increased Hydrophobicity of Virus Proteins
Source: Genes (Basel). 2021 May 27;12(6):826. doi: 10.3390/genes12060826 (PMC8227412; doi:10.3390/genes12060826)
Supplement: Supplementary file 1 [file genes-12-00826-s001.zip › Table S1.pdf]

**Table S1.** Genome coordinates of SARS-CoV-2 proteins

| ORF   | Protein ID     | start nt | end nt | protein name and description                    |
|-------|----------------|----------|--------|-------------------------------------------------|
| ORF1a | YP_009725297.1 | 266      | 805    | nsp1; leader peptide                            |
|       | YP_009725298.1 | 806      | 2719   | nsp2; replicase                                 |
|       | YP_009725299.1 | 2720     | 8554   | nsp3; papain-like proteinase                    |
|       | YP_009725300.1 | 8555     | 10054  | nsp4; contains transmembrane domain TM2         |
|       | YP_009725301.1 | 10055    | 10972  | nsp5; 3C-like proteinase                        |
|       | YP_009725302.1 | 10973    | 11842  | nsp6; putative transmembrane domain             |
|       | YP_009725303.1 | 11843    | 12091  | nsp7; forms a complex with nsp12                |
|       | YP_009725304.1 | 12092    | 12685  | nsp8; forms a complex with nsp12                |
|       | YP_009725305.1 | 12686    | 13024  | nsp9; ssRNA-binding protein                     |
|       | YP_009725306.1 | 13025    | 13441  | nsp10; CysHis rich protein                      |
|       | YP_009725312.1 | 13442    | 13480  | nsp11; identical to the first segment of Nsp12  |
| ORF1b | YP_009725307.1 | 13442    | 16236  | nsp12; RdRp. Forms a complex with NSP7 and NSP8 |
|       | YP_009725308.1 | 16237    | 18039  | nsp13; helicase                                 |
|       | YP_009725309.1 | 18040    | 19620  | nsp14; 3'-to-5' exonuclease                     |
|       | YP_009725310.1 | 19621    | 20658  | nsp15; endoRNAse                                |
|       | YP_009725311.1 | 20658    | 21552  | nsp16; 2'-O-ribose methyltransferase            |
| ORF_S | YP_009724390.1 | 21563    | 25384  | sp; surphace glycoprotein S (spike)             |
| ORF3a | YP_009724391.1 | 25393    | 26220  | ORF3a protein                                   |
| ORF4  | YP_009724392.1 | 26245    | 26472  | sp; envelope protein E                          |
| ORF5  | YP_009724393.1 | 26523    | 27191  | sp; membrane glycoprotein M                     |
| ORF6  | YP_009724394.1 | 27202    | 27387  | ORF6 protein                                    |
| ORF7a | YP_009724395.1 | 27394    | 27759  | ORF7a protein                                   |
| ORF7b | YP_009725318.1 | 27756    | 27887  | ORF7b protein                                   |
| ORF8  | YP_009724396.1 | 27894    | 28259  | ORF8 protein                                    |
| ORF9  | YP_009724397.2 | 28274    | 29533  | sp; nucleocapsid phosphoprotein N               |
| ORF10 | YP_009725255.1 | 29558    | 29674  | ORF10 protein                                   |

nsp - non structural protein

sp - structural protein

RdRp - RNA-dependent RNA polymerase (frame shift protein)
