# Supplementary material for: Mutational Asymmetries in the SARS-CoV-2 Genome May Lead to Increased Hydrophobicity of Virus Proteins
Source: Genes (Basel). 2021 May 27;12(6):826. doi: 10.3390/genes12060826 (PMC8227412; doi:10.3390/genes12060826)
Supplement: Supplementary file 1 [file genes-12-00826-s001.zip › Table S2.pdf]

**Table S2. List of SARS-CoV-2 single nucleotide variants (SNV), their genomic position, character, occurrence in clades and corresponding amino acids changes**

| Region | Gene  | Coordinate | Clade(s)     | SNV | Context | S/N* | Amino acid change |
|--------|-------|------------|--------------|-----|---------|------|-------------------|
| 5'UTR  |       | 204        | GV           | G>U | CGU     |      |                   |
|        |       | 222        | GV           | C>U | UCA     |      |                   |
|        |       | 241        | O,G,GH,GR,GV | C>U | UCG     |      |                   |
| ORF1a  | nsp1  | 445        | GV           | U>C | UUU     | S    | Val60Val          |
|        |       | 490        | S            | U>A | AUG     | N    | Asp75Glu          |
|        |       | 514        | L            | U>C | AUG     | S    | His83His          |
|        | nsp2  | 884        | O            | C>U | ACG     | N    | Arg27Cys          |
|        |       | 913        | GR           | C>U | CCG     | S    | Ser36Ser          |
|        |       | 1059       | O, GH        | C>U | ACC     | N    | Thr85Ile          |
|        |       | 1163       | GR           | A>U | AAU     | N    | Ile120Phe         |
|        |       | 1397       | O            | G>A | AGU     | N    | Val198Ile         |
|        |       | 1440       | L            | G>A | GGC     | N    | Gly212Asp         |
|        |       | 1515       | V            | A>G | CAU     | N    | His237Arg         |
|        |       | 1987       | GV           | A>G | CAC     | S    | Ser394Ser         |
|        |       | 2416       | GH           | C>U | ACA     | S    | Tyr537Tyr         |
|        |       | 2480       | V            | A>G | AAT     | N    | Ile559Val         |
|        |       | 2558       | V            | C>U | ACC     | N    | Pro585Ser         |
|        | nsp3  | 2891       | L            | G>A | GGC     | N    | Ala58Thr          |
|        |       | 3037       | O,G,GH,GR,GV | C>U | UCU     | S    | Phe106Phe         |
|        |       | 3177       | S            | C>U | CCU     | N    | Pro153Leu         |
|        |       | 3267       | GR           | C>U | ACU     | N    | Thr183Ile         |
|        |       | 4540       | S            | C>U | ACA     | S    | Tyr607Tyr         |
|        |       | 4543       | GH           | C>U | CCA     | S    | Thr608Thr         |
|        |       | 5388       | GR           | C>A | GCU     | N    | Ala890Glu         |
|        |       | 5572       | V            | G>U | UGU     | N    | Met951Ile         |
|        |       | 5629       | GH           | G>U | CGU     | S    | Thr970Thr         |
|        |       | 5986       | GR           | C>U | UCA     | S    | Phe1089Phe        |
|        |       | 6286       | GV           | C>U | CCU     | S    | Thr1189Thr        |
|        |       | 6310       | O            | C>A | GCA     | N    | Ser1197Arg        |
|        |       | 6312       | O            | C>A | ACA     | N    | Thr1198Lys        |
|        |       | 6954       | GR           | U>C | AUA     | N    | Ile1412Thr        |
|        |       | 7540       | GR           | U>C | CUA     | S    | Thr1608Thr        |
|        |       | 7926       | GV           | C>U | GCA     | N    | Ala1736Val        |
|        | nsp4  | 8782       | S            | C>U | GCC     | S    | Ser76Ser          |
|        |       | 9223       | V            | C>U | ACG     | S    | His223His         |
|        |       | 9477       | S            | U>A | UUU     | N    | Phe308Tyr         |
|        |       | 9526       | GH           | G>U | UGU     | N    | Met324Ile         |
|        |       | 9745       | GV           | C>U | ACC     | S    | Tyr397Tyr         |
|        |       | 10319      | GH           | C>U | GCU     | N    | Leu89Phe          |
|        | nsp5A | 10798      | G            | C>A | ACA     | S    | Asp248Asp         |
|        | nsp6  | 11083      | O,V          | G>U | UGU     | N    | Leu37Phe          |

|       |       |       |              |     |     |   |           |
|-------|-------|-------|--------------|-----|-----|---|-----------|
| ORF1b | nsp7  | 11230 | S            | G>U | UGC | N | Met86Ile  |
|       |       | 11396 | GV           | C>U | ACU | N | Leu142Phe |
|       |       | 11497 | GH           | C>U | ACU | S | Tyr175Tyr |
|       |       | 11752 | L            | C>U | UCC | S | Leu260Leu |
|       | nsp12 | 11916 | GH           | C>U | UCA | N | Ser25Leu  |
|       |       | 13730 | O            | C>U | GCU | N | Ala97Val  |
|       |       | 13862 | G            | C>U | ACA | N | Thr141Ile |
|       |       | 13993 | GH           | G>U | AGC | N | Ala185Ser |
|       |       | 14408 | O,G,GH,GR,GV | C>U | CCU | N | Pro323Leu |
|       |       | 14676 | GR           | C>U | CCG | S | Pro412Pro |
|       |       | 14805 | S,V          | C>U | ACU | S | Tyr455Tyr |
|       |       | 15279 | GR           | C>U | ACC | S | His613His |
|       |       | 15324 | G            | C>U | ACA | S | Asn628Asn |
|       |       | 15766 | GH           | G>U | AGU | N | Val776Leu |
|       | nsp13 | 16176 | GR           | U>C | CUU | S | Thr912Thr |
|       |       | 16647 | GR           | G>U | CGC | S | Thr137Thr |
|       |       | 16889 | GH           | A>G | AAA | N | Lys218Arg |
|       |       | 17019 | GH           | G>U | AGU | N | Glu261Asp |
|       |       | 17247 | V            | U>C | GUG | S | Arg337Arg |
|       |       | 17410 | L            | C>U | ACG | N | Arg392Cys |
|       |       | 17615 | GR           | A>G | AAG | N | Lys460Arg |
|       |       | 17747 | S            | C>U | CCU | N | Pro504Leu |
|       | nps14 | 17858 | S            | A>G | UAU | N | Tyr541Cys |
|       |       | 18060 | S            | C>U | UCU | S | Leu7Leu   |
|       |       | 18424 | GH           | A>G | UAA | N | Asp129Asn |
|       |       | 18555 | GR           | C>U | ACA | S | Asp172Asp |
|       |       | 18736 | S            | U>C | AUU | N | Phe233Leu |
|       |       | 18877 | GH           | C>U | UCU | S | Leu280Leu |
|       | nsp15 | 19524 | O            | C>U | UCG | S | Leu495Leu |
|       |       | 20268 | G            | A>G | UAG | S | Leu216Leu |
|       | nsp16 | 20661 | GV           | U>C | CUA | S | Ser1Ser   |
|       |       | 21255 | GV           | G>C | CGU | S | Ala199Ala |
|       |       | 21304 | GH           | C>U | ACG | N | Arg216Cys |
|       |       | 21614 | GV           | C>U | UCU | N | Leu18Phe  |
| S     | S     | 22227 | GV           | C>U | GCU | N | Ala222Val |
|       |       | 22346 | GV           | G>U | UGC | N | Ala262Ser |
|       |       | 22444 | GH           | C>U | ACC | S | Asp294Asp |
|       |       | 22468 | S            | G>U | CGU | S | Thr302Thr |
|       |       | 22992 | GH,GR        | G>A | AGC | N | Ser477Asn |
|       |       | 23063 | GR           | A>U | TAA | N | Asn501Tyr |
|       |       | 23185 | O            | C>U | UCA | S | Phe541Phe |
|       |       | 23271 | GR           | C>A | GCU | N | Ala570Asp |
|       |       | 23401 | GR           | G>A | AGG | S | Gln613Gln |
|       |       | 23403 | O,G,GH,GR,GV | A>G | GAU | N | Asp614Gly |
|       |       | 23604 | GR           | C>A | CCU | N | Pro681His |
|       |       | 23709 | GR           | C>U | ACA | N | Thr716Ile |

|       |       |        |      |         |     |       |            |
|-------|-------|--------|------|---------|-----|-------|------------|
|       |       | 23929  | O    | C>U     | ACA | S     | Tyr756Tyr  |
|       |       | 24034  | S    | C>U     | ACA | S     | Asn824Asn  |
|       |       | 24334  | GV   | C>U     | GCA | S     | Ala924Ala  |
|       |       | 24506  | GR   | U>G     | UUC | N     | Ser982Ala  |
|       |       | 24694  | S    | A>U     | GAA | S     | Gly1044Gly |
| ORF3a | ORF3a | 24914  | GR   | G>C     | AGA | N     | Asp1118His |
|       |       | 25429  | G    | G>U     | UGU | N     | Val13Leu   |
|       |       | 25563  | O,GH | G>U     | AGA | N     | Gln57His   |
|       |       | 25710  | GH   | C>U     | UCU | S     | Leu106Leu  |
|       |       | 25907  | GH   | G>U     | GGU | N     | Gly172Val  |
|       | M     | 25979  | S    | G>U     | GGA | N     | Gly196Val  |
|       |       | 26144  | V    | G>U     | GGU | N     | Gly251Val  |
|       |       | 26729  | S    | U>C     | CUG | S     | Ala69Ala   |
|       |       | 26735  | O,GH | C>U     | ACA | S     | Tyr71Tyr   |
|       |       | 26801  | GV   | C>G     | UCA | S     | Leu93Leu   |
| ORF8  | ORF8  | 26876  | GH   | U>C     | UUC | S     | Ile118Ile  |
|       |       | 27944  | GV   | C>U     | ACC | S     | His17His   |
|       |       | 27964  | GH   | C>U     | UCA | N     | Ser24Leu   |
|       |       | 27972  | GR   | C>U     | UCA | Stop  | Gln27Stop  |
|       |       | 28048  | GR   | G>U     | AGA | N     | Arg52Ile   |
|       |       | 28077  | S    | G>C     | CGU | N     | Val62Leu   |
|       |       | 28111  | GR   | A>G     | UAC | N     | Tyr73Cys   |
|       |       | 28144  | S    | U>C     | UUA | N     | Leu84Ser   |
|       |       | 28167  | S    | G>A     | GGA | N     | Glu92Lys   |
|       |       | 28280- |      |         |     |       |            |
| N     | N     | 28282  | GR   | GAU>CUA |     | N,N,N | Asp3Leu    |
|       |       | 28311  | S,O  | C>U     | CCC | N     | Pro13Leu   |
|       |       | 28472  | GH   | C>U     | CCC | N     | Pro67Ser   |
|       |       | 28657  | S    | C>U     | ACG | S     | Asp128Asp  |
|       |       | 28688  | O    | U>C     | CUU | S     | Leu139Leu  |
|       |       | 28836  | G    | C>U     | UCA | N     | Ser188Leu  |
|       |       | 28854  | G,GH | C>U     | UCA | N     | Ser194Leu  |
|       |       | 28863  | S    | C>U     | UCA | N     | Ser197Leu  |
|       |       | 28869  | GH   | C>U     | CCA | N     | Pro199Leu  |
|       |       | 28878  | S    | G>A     | AGU | N     | Ser202Asn  |
|       |       | 28881- |      |         |     |       |            |
|       |       | 28882  | O,GR | AGG>AAA |     | N,S   | Arg203Lys  |
|       |       | 28883  | O,GR | G>C     | GGG | N     | Gly204Arg  |
|       |       | 28932  | GV   | C>U     | GCU | N     | Ala220Val  |
|       |       | 28975  | GH   | G>C     | UGU | N     | Met234Ile  |
|       |       | 28977  | GR   | C>U     | UCU | N     | Ser235Phe  |
|       |       | 29366  | GV   | C>U     | ACC | N     | Pro365Ser  |
|       |       | 29386  | GV   | C>U     | ACA | S     | Asp371Asp  |
|       |       | 29399  | GH   | G>A     | GGC | N     | Ala376Thr  |
|       |       | 29645  | GV   | G>U     | AGU | Stop  | Val30Stop  |
| ORF10 |       | 29868  | GR   | G>A     | UGA |       |            |
| 3'UTR |       |        |      |         |     |       |            |

29870

GR

C>A

ACA

---

**Boxed - mutation hot spot**

nsp - non structural protein

\* S - synonymous, N - nonsynonymous substitutions
