# Supplementary material for: Mutational Asymmetries in the SARS-CoV-2 Genome May Lead to Increased Hydrophobicity of Virus Proteins
Source: Genes (Basel). 2021 May 27;12(6):826. doi: 10.3390/genes12060826 (PMC8227412; doi:10.3390/genes12060826)
Supplement: Supplementary file 1 [file genes-12-00826-s001.zip › Table S3.pdf]

**Table S3. Mutation spectra determined in different SARS-CoV-2 lineages**

| clade | relative abundance of substitution type [%] |      |     |      |     |      |      |     |      |     |      |     | sum   |
|-------|---------------------------------------------|------|-----|------|-----|------|------|-----|------|-----|------|-----|-------|
|       | A>C                                         | A>G  | A>U | C>A  | C>G | C>U  | G>A  | G>C | G>U  | U>A | U>C  | U>G |       |
| S     | 0.0                                         | 4.3  | 4.3 | 0.0  | 0.0 | 43.5 | 8.7  | 4.3 | 13.0 | 8.7 | 13.0 | 0.0 | 100.0 |
| L     | 0.0                                         | 0.0  | 0.0 | 0.0  | 0.0 | 40.0 | 40.0 | 0.0 | 0.0  | 0.0 | 20.0 | 0.0 | 100.0 |
| V     | 0.0                                         | 22.2 | 0.0 | 0.0  | 0.0 | 33.3 | 0.0  | 0.0 | 33.3 | 0.0 | 11.1 | 0.0 | 100.0 |
| O     | 0.0                                         | 4.8  | 0.0 | 9.5  | 0.0 | 52.4 | 14.3 | 4.8 | 9.5  | 0.0 | 4.8  | 0.0 | 100.0 |
| G     | 0.0                                         | 18.2 | 0.0 | 9.1  | 0.0 | 63.6 | 0.0  | 0.0 | 9.1  | 0.0 | 0.0  | 0.0 | 100.0 |
| GH    | 0.0                                         | 9.4  | 0.0 | 0.0  | 0.0 | 56.3 | 6.3  | 3.1 | 21.9 | 0.0 | 3.1  | 0.0 | 100.0 |
| GR    | 0.0                                         | 6.1  | 9.1 | 12.1 | 0.0 | 27.3 | 15.2 | 9.1 | 6.1  | 3.0 | 9.1  | 3.0 | 100.0 |
| GV    | 0.0                                         | 8.3  | 0.0 | 0.0  | 4.2 | 62.5 | 0.0  | 4.2 | 12.5 | 0.0 | 8.3  | 0.0 | 100.0 |
