# Supplementary material for: Mutational Asymmetries in the SARS-CoV-2 Genome May Lead to Increased Hydrophobicity of Virus Proteins
Source: Genes (Basel). 2021 May 27;12(6):826. doi: 10.3390/genes12060826 (PMC8227412; doi:10.3390/genes12060826)
Supplement: Supplementary file 1 [file genes-12-00826-s001.zip › Table S4.pdf]

**Table S4. Frequency of different substitutions types in the SARS-CoV-2 lineages and among the virus variants identified in a single individual**

| substitution  | A>C [%] |     | A>G [%] |     | A>U [%] |     | C>A [%] |     | C>G [%] |     | C>U [%] |      | G>A [%] |      | G>C [%] |     | G>U [%] |      | U>A [%] |     | U>C [%] |      | U>G [%] |     | total [%] |       |
|---------------|---------|-----|---------|-----|---------|-----|---------|-----|---------|-----|---------|------|---------|------|---------|-----|---------|------|---------|-----|---------|------|---------|-----|-----------|-------|
|               | GL      | Pa   | GL      | Pa   | GL      | Pa  | GL      | Pa   | GL      | Pa  | GL      | Pa   | GL      | Pa  | GL        | Pa    |
| nonsynonymous | 0.0     | 0.0 | 5.9     | 7.0 | 2.2     | 3.0 | 3.7     | 2.0 | 0.0     | 0.0 | 20.7    | 19.0 | 5.9     | 14.0 | 3.7     | 4.0 | 10.4    | 13.0 | 2.2     | 2.0 | 2.2     | 5.0  | 0.7     | 2.0 | 57.8      | 71.0  |
| synonymous    | 0.0     | 0.0 | 1.5     | 0.0 | 0.7     | 0.0 | 0.7     | 1.0 | 0.7     | 0.0 | 22.2    | 14.0 | 1.5     | 0.0  | 0.7     | 1.0 | 2.2     | 2.0  | 0.0     | 0.0 | 6.7     | 6.0  | 0.0     | 1.0 | 37.0      | 25.0  |
| UTR           | 0.0     | 0.0 | 0.0     | 0.0 | 0.0     | 0.0 | 0.7     | 0.0 | 0.0     | 0.0 | 1.5     | 0.0  | 0.7     | 0.0  | 0.0     | 1.0 | 0.7     | 1.0  | 0.0     | 0.0 | 0.0     | 0.0  | 0.0     | 0.0 | 3.7       | 2.0   |
| stop          | 0.0     | 0.0 | 0.0     | 0.0 | 0.0     | 0.0 | 0.0     | 0.0 | 0.0     | 0.0 | 0.7     | 1.0  | 0.0     | 0.0  | 0.0     | 0.0 | 0.7     | 1.0  | 0.0     | 0.0 | 0.0     | 0.0  | 0.0     | 0.0 | 1.5       | 2.0   |
| total         | 0.0     | 0.0 | 7.4     | 7.0 | 3.0     | 3.0 | 5.2     | 3.0 | 0.7     | 0.0 | 45.2    | 34.0 | 8.1     | 14.0 | 4.4     | 6.0 | 14.1    | 17.0 | 2.2     | 2.0 | 8.9     | 11.0 | 0.7     | 3.0 | 100.0     | 100.0 |

GL - Global pattern; Pa - virus variants identified in the course of medical treatment of a single individual
