# Supplementary material for: Mutational Asymmetries in the SARS-CoV-2 Genome May Lead to Increased Hydrophobicity of Virus Proteins
Source: Genes (Basel). 2021 May 27;12(6):826. doi: 10.3390/genes12060826 (PMC8227412; doi:10.3390/genes12060826)
Supplement: Supplementary file 1 [file genes-12-00826-s001.zip › Table S5.pdf]

**Table S5. Statistical comparisons of SNV in early and late clades of SARS-CoV-2 genomes**

| mutation | 1% treshold                 |      |             |      | 5% treshold                   |     |             |     |
|----------|-----------------------------|------|-------------|------|-------------------------------|-----|-------------|-----|
|          | early clades                |      | late clades |      | early clades                  |     | late clades |     |
|          | no                          | %    | no          | %    | no                            | %   | no          | %   |
| A>C      | 0                           | 0.0  | 0           | 0.0  | 0                             | 0   | 0           | 0   |
| A>G      | 4                           | 5.9  | 10          | 8.1  | 2                             | 10  | 2           | 4   |
| A>U      | 1                           | 1.5  | 4           | 3.3  | 0                             | 0   | 3           | 6   |
| C>A      | 2                           | 2.9  | 3           | 2.4  | 1                             | 5   | 3           | 6   |
| C>G      | 1                           | 1.5  | 1           | 0.8  | 0                             | 0   | 1           | 2   |
| C>U      | 31                          | 45.6 | 60          | 48.8 | 11                            | 55  | 21          | 42  |
| G>A      | 9                           | 13.2 | 6           | 4.9  | 1                             | 5   | 3           | 6   |
| G>C      | 2                           | 2.9  | 5           | 4.1  | 0                             | 0   | 4           | 8   |
| G>U      | 9                           | 13.2 | 19          | 15.4 | 2                             | 10  | 4           | 8   |
| U>A      | 2                           | 2.9  | 1           | 0.8  | 0                             | 0   | 1           | 2   |
| U>C      | 6                           | 8.8  | 8           | 6.5  | 2                             | 10  | 3           | 6   |
| U>G      | 0                           | 0.0  | 1           | 0.8  | 0                             | 0   | 1           | 2   |
| indels   | 1                           | 1.5  | 5           | 4.1  | 1                             | 5   | 4           | 8   |
| sum      | 68                          | 100  | 123         | 100  | 20                            | 100 | 50          | 100 |
| Rp       | 0.9724                      |      |             |      | 0.9630                        |     |             |     |
| Rs       | 0.8584                      |      |             |      | 0.5896                        |     |             |     |
| P2       | 0.0002                      |      |             |      | 0.0339                        |     |             |     |
| comment  | strong positive correlation |      |             |      | moderate positive correlation |     |             |     |
