# Supplementary material for: Mutational Asymmetries in the SARS-CoV-2 Genome May Lead to Increased Hydrophobicity of Virus Proteins
Source: Genes (Basel). 2021 May 27;12(6):826. doi: 10.3390/genes12060826 (PMC8227412; doi:10.3390/genes12060826)
Supplement: Supplementary file 1 [file genes-12-00826-s001.zip › Table S6.pdf]

**Table S6. Amino acids hydrophobicity changes induced by nonsynonymous nucleotide substitutions along the virus genome**

| Region | Coordinate | Clade(s)     | Mutation | amino acids<br>change | character <sup>(1)</sup> | Hydrophobicity changes  |        |       |                         |        |       |
|--------|------------|--------------|----------|-----------------------|--------------------------|-------------------------|--------|-------|-------------------------|--------|-------|
|        |            |              |          |                       |                          | Method A <sup>(2)</sup> |        |       | Method B <sup>(2)</sup> |        |       |
|        |            |              |          |                       |                          | Reference               | Allele | Shift | Reference               | Allele | Shift |
| ORF1a  | 490        | S            | U>A      | Asp75Glu              | P>P                      | -3.5                    | -3.5   | 0     | -123                    | -106   | 17    |
|        | 884        | O            | C>U      | Arg27Cys              | P>N                      | -4.5                    | 2.5    | 7     | -130                    | 78     | 208   |
|        | 1059       | O, GH        | C>U      | Thr85Ile              | P>N                      | -0.7                    | 4.5    | 5.2   | -9                      | 172    | 181   |
|        | 1163       | GR           | A>U      | Ile120Phe             | N>N                      | 4.5                     | 2.8    | -1.7  | 172                     | 179    | 7     |
|        | 1397       | O            | G>A      | Val198Ile             | N>N                      | 4.2                     | 4.5    | 0.3   | 123                     | 172    | 49    |
|        | 1440       | L            | G>A      | Gly212Asp             | N>P                      | -0.4                    | -3.5   | -3.1  | 0                       | -123   | -123  |
|        | 1515       | V            | A>G      | His237Arg             | P>P                      | -3.2                    | -4.5   | -1.3  | -34                     | -130   | -96   |
|        | 2480       | V            | A>G      | Ile559Val             | N>N                      | 4.5                     | 4.2    | -0.3  | 172                     | 123    | -49   |
|        | 2558       | V            | C>U      | Pro585Ser             | P>P                      | -1.6                    | -0.8   | 0.8   | 47                      | -57    | -104  |
|        | 2891       | L            | G>A      | Ala58Thr              | N>P                      | 1.8                     | -0.7   | -2.5  | 46                      | -9     | -55   |
|        | 3177       | S            | C>U      | Pro153Leu             | P>N                      | -1.6                    | 3.8    | 5.4   | 47                      | 165    | 118   |
|        | 3267       | GR           | C>U      | Thr183Ile             | P>N                      | -0.7                    | 4.5    | 5.2   | -9                      | 172    | 181   |
|        | 5388       | GR           | C>A      | Ala890Glu             | N>P                      | 1.8                     | -3.5   | -5.3  | 46                      | -106   | -152  |
|        | 5572       | V            | G>U      | Met951Ile             | N>N                      | 1.9                     | 4.5    | 2.6   | 119                     | 172    | 53    |
|        | 6310       | O            | C>A      | Ser1197Arg            | P>P                      | -0.8                    | -4.5   | -3.7  | -57                     | -130   | -73   |
|        | 6312       | O            | C>A      | Thr1198Lys            | P>P                      | -0.7                    | -3.9   | -3.2  | -9                      | -100   | -91   |
|        | 6954       | GR           | U>C      | Ile1412Thr            | N>P                      | 4.5                     | -0.7   | -5.2  | 172                     | -9     | -181  |
|        | 7926       | GV           | C>U      | Ala1736Val            | N>N                      | 1.8                     | 4.2    | 2.4   | 46                      | 123    | 77    |
|        | 9477       | S            | U>A      | Phe308Tyr             | N>P                      | 2.8                     | -1.3   | -4.1  | 179                     | 64     | -115  |
|        | 9526       | GH           | G>U      | Met324Ile             | N>N                      | 1.9                     | 4.5    | 2.6   | 119                     | 172    | 53    |
|        | 10319      | GH           | C>U      | Leu89Phe              | N>N                      | 3.8                     | 2.8    | -1    | 165                     | 179    | 14    |
|        | 11083      | O,V          | G>U      | Leu37Phe              | N>N                      | 3.8                     | 2.8    | -1    | 165                     | 179    | 14    |
|        | 11230      | S            | G>U      | Met86Ile              | N>N                      | 1.9                     | 4.5    | 2.6   | 119                     | 172    | 53    |
|        | 11396      | GV           | C>U      | Leu142Phe             | N>N                      | 3.8                     | 2.8    | -1    | 165                     | 179    | 14    |
|        | 11916      | GH           | C>U      | Ser25Leu              | P>N                      | -0.8                    | 3.8    | 4.6   | -57                     | 165    | 222   |
| ORF1b  | 13730      | O            | C>U      | Ala97Val              | N>N                      | 1.8                     | 4.2    | 2.4   | 46                      | 123    | 77    |
|        | 13862      | G            | C>U      | Thr141Ile             | P>N                      | -0.7                    | 4.5    | 5.2   | -9                      | 172    | 181   |
|        | 13993      | GH           | G>U      | Ala185Ser             | N>P                      | 1.8                     | -0.8   | -2.6  | 46                      | -57    | -103  |
|        | 14408      | O,G,GH,GR,GV | C>U      | Pro323Leu             | P>N                      | -1.6                    | 3.8    | 5.4   | 47                      | 165    | 118   |

|       |             |              |         |            |     |      |      |      |      |      |      |
|-------|-------------|--------------|---------|------------|-----|------|------|------|------|------|------|
|       | 15766       | GH           | G>U     | Val776Leu  | N>N | 4.2  | 3.8  | -0.4 | 123  | 165  | 42   |
|       | 16889       | GH           | A>G     | Lys218Arg  | P>P | -3.9 | -4.5 | -0.6 | -100 | -130 | -30  |
|       | 17019       | GH           | G>U     | Glu261Asp  | P>P | -3.5 | -3.5 | 0    | -106 | -123 | -17  |
|       | 17410       | L            | C>U     | Arg392Cys  | P>N | -4.5 | 2.5  | 7    | -130 | 78   | 208  |
|       | 17615       | GR           | A>G     | Lys460Arg  | P>P | -3.9 | -4.5 | -0.6 | -100 | -130 | -30  |
|       | 17747       | S            | C>U     | Pro504Leu  | P>N | -1.6 | 3.8  | 5.4  | 47   | 165  | 118  |
|       | 17858       | S            | A>G     | Tyr541Cys  | P>N | -1.3 | 2.5  | 3.8  | 64   | 78   | 14   |
|       | 18424       | GH           | A>G     | Asp129Asn  | P>P | -3.5 | -3.5 | 0    | -123 | -110 | 13   |
|       | 18736       | S            | U>C     | Phe233Leu  | N>N | 2.8  | 3.8  | 1    | 179  | 165  | -14  |
|       | 21304       | GH           | C>U     | Arg216Cys  | P>N | -4.5 | 2.5  | 7    | -130 | 78   | 208  |
| S     | 21614       | GV           | C>U     | Leu18Phe   | N>N | 3.8  | 2.8  | -1   | 165  | 179  | 14   |
|       | 22227       | GV           | C>U     | Ala222Val  | N>N | 1.8  | 4.2  | 2.4  | 46   | 123  | 77   |
|       | 22346       | GV           | G>U     | Ala262Ser  | N>P | 1.8  | -0.8 | -2.6 | 46   | -57  | -103 |
|       | 22992       | GH,GR        | G>A     | Ser477Asn  | P>P | -0.8 | -3.5 | -2.7 | -57  | -110 | -53  |
|       | 23063       | GR           | A>U     | Asn501Tyr  | P>P | -3.5 | -1.3 | 2.2  | -110 | 64   | 174  |
|       | 23271       | GR           | C>A     | Ala570Asp  | N>P | 1.8  | -3.5 | -5.3 | 46   | -123 | -169 |
|       | 23403       | O,G,GH,GR,GV | A>G     | Asp614Gly  | P>N | -3.5 | -0.4 | 3.1  | -123 | 0    | 123  |
|       | 23604       | GR           | C>A     | Pro681His  | P>P | -1.6 | -3.2 | -1.6 | 47   | -34  | -81  |
|       | 23709       | GR           | C>U     | ThrT716Ile | P>N | -0.7 | 4.5  | 5.2  | -9   | 172  | 181  |
|       | 24506       | GR           | U>G     | Ser982Ala  | P>N | -0.8 | 1.8  | 2.6  | -57  | 46   | 103  |
| ORF3a | 24914       | GR           | G>C     | Asp1118His | P>P | -3.5 | -3.2 | 0.3  | -123 | -34  | 89   |
|       | 25429       | G            | G>U     | Val13Leu   | N>N | 4.2  | 3.8  | -0.4 | 123  | 165  | 42   |
|       | 25563       | O,GH         | G>U     | Gln57His   | P>P | -3.5 | -3.2 | 0.3  | -81  | -34  | 47   |
|       | 25907       | GH           | G>U     | Gly172Val  | N>N | -0.4 | 4.2  | 4.6  | 0    | 123  | 123  |
|       | 25979       | S            | G>U     | Gly196Val  | N>N | -0.4 | 4.2  | 4.6  | 0    | 123  | 123  |
|       | 26144       | V            | G>U     | Gly251Val  | N>N | -0.4 | 4.2  | 4.6  | 0    | 123  | 123  |
| ORF8  | 27964       | GH           | C>U     | Ser24Leu   | P>N | -0.8 | 3.8  | 4.6  | -57  | 165  | 222  |
|       | 28048       | GR           | G>U     | Arg52Ile   | P>N | -4.5 | 4.5  | 9    | -130 | 172  | 302  |
|       | 28077       | S            | G>C     | Val62Leu   | N>N | 4.2  | 3.8  | -0.4 | 123  | 165  | 42   |
|       | 28111       | GR           | A>G     | Tyr73Cys   | P>N | -1.3 | 2.5  | 3.8  | 64   | 78   | 14   |
|       | 28144       | S            | U>C     | Leu84Ser   | N>P | 3.8  | -0.8 | -4.6 | 165  | -57  | -222 |
|       | 28167       | S            | G>A     | Glu92Lys   | P>P | -3.5 | -3.9 | -0.4 | -106 | -100 | 6    |
| N     | 28280-28282 | GR           | GAU>CUA | Asp3Leu    | P>P | -3.5 | 3.8  | 7.3  | -123 | 165  | 288  |
|       | 28311       | S,O          | C>U     | Pro13Leu   | P>N | -1.6 | 3.8  | 5.4  | 47   | 165  | 118  |

|             |      |         |           |     |      |      |      |      |      |      |
|-------------|------|---------|-----------|-----|------|------|------|------|------|------|
| 28472       | GH   | C>U     | Pro67Ser  | P>P | -1.6 | -0.8 | 0.8  | 47   | -57  | -104 |
| 28836       | G    | C>U     | Ser188Leu | P>N | -0.8 | 3.8  | 4.6  | -57  | 165  | 222  |
| 28854       | G,GH | C>U     | Ser194Leu | P>N | -0.8 | 3.8  | 4.6  | -57  | 165  | 222  |
| 28863       | S    | C>U     | Ser197Leu | P>N | -0.8 | 3.8  | 4.6  | -57  | 165  | 222  |
| 28869       | GH   | C>U     | Pro199Leu | P>N | -1.6 | 3.8  | 5.4  | 47   | 165  | 118  |
| 28878       | S    | G>A     | Ser202Asn | P>P | -0.8 | -3.5 | -2.7 | -57  | -110 | -53  |
| 28881-28882 | O,GR | AGG>AAA | Arg203Lys | P>P | -4.5 | -3.9 | 0.6  | -130 | -100 | 30   |
| 28883       | O,GR | G>C     | Gly204Arg | N>P | -0.4 | -4.5 | -4.1 | 0    | -130 | -130 |
| 28932       | GV   | C>U     | Ala220Val | N>N | 1.8  | 4.2  | 2.4  | 46   | 123  | 77   |
| 28975       | GH   | G>C     | Met234Ile | N>N | 1.9  | 4.5  | 2.6  | 119  | 172  | 53   |
| 28977       | GR   | C>U     | Ser235Phe | P>N | -0.8 | 2.8  | 3.6  | -57  | 179  | 236  |
| 29366       | GV   | C>U     | Pro365Ser | P>P | -1.6 | -0.8 | 0.8  | 47   | -57  | -104 |
| 29399       | GH   | G>A     | Ala376Thr | N>P | 1.8  | -0.7 | -2.5 | 46   | -9   | -55  |

(1)Polar (P), nonpolar (NP), no change [0]

(2) Hydrophobicity scale of Kyte and Doolittle (method A) and Palecz (method B)



Polar nonpolar and reverse [NP], no change [0]

Boxed - mutation hot spot

nsp - non structural protein
