# Supplementary material for: Mutational Asymmetries in the SARS-CoV-2 Genome May Lead to Increased Hydrophobicity of Virus Proteins
Source: Genes (Basel). 2021 May 27;12(6):826. doi: 10.3390/genes12060826 (PMC8227412; doi:10.3390/genes12060826)
Supplement: Supplementary file 1 [file genes-12-00826-s001.zip › Table S7.pdf]

**Table S7. Comparisons of amino acid hydrophobicity changes between early and late clades, as well as single individual.**

| group 1 |                        |         |      |        | group 2     |                        |         |      |        | grop1/group2 comparative statistics |             |              |       |             |
|---------|------------------------|---------|------|--------|-------------|------------------------|---------|------|--------|-------------------------------------|-------------|--------------|-------|-------------|
| name    | descriptive statistics |         |      |        | name        | descriptive statistics |         |      |        | T-test                              |             | Mann whitney |       |             |
|         | N                      | average | SD   | median |             | N                      | average | SD   | median | p2                                  | 95% level   | p2           | Z     | 95% level   |
| early   | 34                     | 1.2     | 3.46 | 0.7    | late        | 48                     | 1.45    | 3.45 | 1.5    | 0.36                                | not signif. | 0.88         | -0.16 | not signif. |
| early   | 34                     | 1.2     | 3.46 | 0.7    | single ind. | 70                     | 0.61    | 3.1  | 0.3    | 0.10                                | not signif. | 0.44         | 0.77  | not signif. |
| late    | 48                     | 1.45    | 3.45 | 1.5    | single ind. | 70                     | 0.61    | 3.1  | 0.3    | 0.09                                | not signif. | 0.21         | 1.25  | not signif. |

Early and late groups are defined in Table 1
