# Supplementary material for: Mutational Asymmetries in the SARS-CoV-2 Genome May Lead to Increased Hydrophobicity of Virus Proteins
Source: Genes (Basel). 2021 May 27;12(6):826. doi: 10.3390/genes12060826 (PMC8227412; doi:10.3390/genes12060826)
Supplement: Supplementary file 1 [file genes-12-00826-s001.zip › Table S8.pdf]

**Table S8. Frequency of nucleotides in motifs flanking the C>U substitutions**

| Base       | 5' position |                           | Percentage   | 3' position |                           |
|------------|-------------|---------------------------|--------------|-------------|---------------------------|
|            | Count [C]   | Count after normalisation |              | Count [C]   | Count after normalisation |
| A          | 25          | 20.90                     | 31.7         | 22          | 18.39                     |
| C          | 10          | 13.59                     | 20.6         | 19          | 25.82                     |
| G          | 7           | 8.93                      | 13.5         | 9           | 11.48                     |
| U          | 29          | 22.59                     | 34.2         | 21          | 16.36                     |
| <b>Sum</b> | <b>71</b>   | <b>66.00</b>              | <b>100.0</b> | <b>71</b>   | <b>72.04</b>              |

Data sets to Table S8

| Triplet    | Count     | Frequency   |
|------------|-----------|-------------|
| ACA        | 9         | 0.126760563 |
| ACC        | 7         | 0.098591549 |
| ACG        | 5         | 0.070422535 |
| ACU        | 4         | 0.056338028 |
| CCA        | 2         | 0.028169014 |
| CCC        | 2         | 0.028169014 |
| CCG        | 2         | 0.028169014 |
| CCU        | 4         | 0.056338028 |
| GCA        | 2         | 0.028169014 |
| GCC        | 1         | 0.014084507 |
| GCG        | 0         | 0           |
| GCU        | 4         | 0.056338028 |
| UCA        | 9         | 0.126760563 |
| UCC        | 9         | 0.126760563 |
| UCG        | 2         | 0.028169014 |
| UCU        | 9         | 0.126760563 |
| <b>Sum</b> | <b>71</b> |             |

**Nucleotide content (reference genome)**

|              | Frequency [f(Ni)] |
|--------------|-------------------|
| Adenine (A)  | 0.299             |
| Cytosine (C) | 0.184             |
| Guanine (G)  | 0.196             |
| uracile (U)  | 0.321             |
| Sum          | 1                 |

**Formula used for normalisation of nucleotide counts:**

$$\text{Count} = C_i / (f(N_i) * 4)$$

where:  $C_i$  - observed count if i-nucleotide  
 $f(N_i)$  - frequency of i-nucleotide in the genome
