# Supplementary material for: Mutational Asymmetries in the SARS-CoV-2 Genome May Lead to Increased Hydrophobicity of Virus Proteins
Source: Genes (Basel). 2021 May 27;12(6):826. doi: 10.3390/genes12060826 (PMC8227412; doi:10.3390/genes12060826)
Supplement: Supplementary file 1 [file genes-12-00826-s001.zip › Table S10.pdf]

**Table S10.** Relationship between biochemical properties of amino acids and nucleotide compositions of corresponding codons

| Amino acid           |      |                     | Codons                       | [U] - uracil content [%] |        |        | [A] – adenine content [%] |        |        |
|----------------------|------|---------------------|------------------------------|--------------------------|--------|--------|---------------------------|--------|--------|
| Character            | aa   | Hydr. <sup>1)</sup> |                              | pos. 1                   | pos. 2 | pos. 3 | pos. 1                    | pos. 2 | pos. 3 |
| strongly hydrophob.  | Ile  | 4.50                | AUU. AUC. AUA                | 0                        | 100    | 33     | 100                       | 0      | 33     |
|                      | Leu  | 3.80                | CUU. CUC. CUA. CUG. UUA. UUG | 33                       | 100    | 17     | 0                         | 0      | 33     |
|                      | Phe  | 2.80                | UUU. UUC                     | 100                      | 100    | 50     | 0                         | 0      | 0      |
|                      | Val  | 4.20                | GUU. GUC. GUA. GUG           | 0                        | 100    | 25     | 0                         | 0      | 25     |
|                      | mean | 3.83                |                              | 33.3                     | 100    | 31.3   | 25.0                      | 0.0    | 22.8   |
| strongly hydrophilic | Asn  | -3.50               | AAU. AAC                     | 0                        | 0      | 50     | 100                       | 100    | 0      |
|                      | Asp  | -3.50               | GAU. GAC                     | 0                        | 0      | 50     | 0                         | 100    | 0      |
|                      | Arg  | -3.50               | CGU. CGC. CGA. CGG. AGA. AGG | 0                        | 0      | 17     | 33                        | 0      | 33     |
|                      | Lys  | -3.90               | AAA. AAG                     | 0                        | 0      | 0      | 100                       | 100    | 50     |
|                      | Gln  | -3.50               | CAG. CAA                     | 0                        | 0      | 0      | 0                         | 100    | 50     |
|                      | Glu  | -3.50               | GAA. GAG                     | 0                        | 0      | 0      | 0                         | 100    | 50     |
|                      | mean | -3.57               |                              | 0.0                      | 0.0    | 19.5   | 38.8                      | 83.3   | 30.5   |

<sup>1</sup> Hydrophobicity values are according to [33].
